# Supplementary material for: Assessing and Responding to Palliative Care Needs in Rural Sub-Saharan Africa: Results from a Model Intervention and Situation Analysis in Malawi
Source: PubMed Central journal article supplement (PMC4197005; doi:10.1371/journal.pone.0110457), 2014-10-14
Supplement: pone.0110457.s002.pdf [file pone.0110457.s002.pdf]

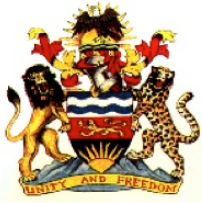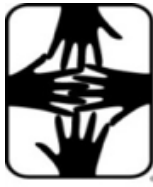

**A. Demographics**

|                                                                                  |                                                                                                             |
|----------------------------------------------------------------------------------|-------------------------------------------------------------------------------------------------------------|
| Last Name: _____                                                                 | Village: _____                                                                                              |
| First Name: _____                                                                | Referred From: <input type="checkbox"/> CCC <input type="checkbox"/> KS Clinic <input type="checkbox"/> OPD |
| Birthdate (Day/Month/Year): ___/___/___                                          | <input type="checkbox"/> Health Center <input type="checkbox"/> Hospital Ward                               |
| Age: _____ EMR #: _____                                                          | <input type="checkbox"/> Other (Specify): _____                                                             |
| Sex: <input type="checkbox"/> F <input type="checkbox"/> M Marital Status: _____ | Reason for Referral: _____                                                                                  |
| Caregiver/Next of Kin: _____                                                     | _____                                                                                                       |
| _____                                                                            | _____                                                                                                       |

**B. Medical History**

Presenting Concerns: \_\_\_\_\_

Diagnosis: \_\_\_\_\_

Prognosis: \_\_\_\_\_

HIV Status:  Reactive  Nonreactive  Not Tested

Diagnosis Discussed with Patient:  Yes  No    Diagnosis Discussed with Caregiver:  Yes  No

Past Medical History: \_\_\_\_\_

\_\_\_\_\_

History Given By:  Patient  Caregiver  Other (Specify): \_\_\_\_\_

**C. Physical Exam**

|                  |                        |                                                                                  |
|------------------|------------------------|----------------------------------------------------------------------------------|
| <b>General</b>   | <b>Abdominal</b>       | <p style="text-align: center;"><b>Front</b>                      <b>Back</b></p> |
| <b>Weight</b>    | <b>Extremities</b>     |                                                                                  |
| <b>Pulmonary</b> | <b>Neurological</b>    |                                                                                  |
| <b>Cardiac</b>   | <b>Musculoskeletal</b> |                                                                                  |

**D. Palliative Care Outcomes Scale (Use Visual Symptom Scale Below)**

Ask the patient to rate the following from 0 (not at all/nothing) to 5 (very much/everything):

|                                                                                                         |                                                                                                                   |
|---------------------------------------------------------------------------------------------------------|-------------------------------------------------------------------------------------------------------------------|
| 1) Please rate your pain during the last 3 days:<br>_____ (0-5)                                         | 3) Have you been feeling worried about your illness in the past 3 days? _____ (0-5)                               |
| 2a) Have you had any other symptoms that have been affecting you for the last 3 days?<br>_____ (0-5)    | 4) Over the past 3 days, have you been able to share how you are feeling with your family or friends? _____ (0-5) |
| 2b) If so, please rate each symptom during the last three days (Specify Symptoms Below):<br>_____ (0-5) | 5) Over the past 3 days have you felt that life was worthwhile? _____ (0-5)                                       |
| _____ (0-5)                                                                                             | 6) Over the past 3 days, have you felt at peace? _____ (0-5)                                                      |
| _____ (0-5)                                                                                             | 7) Have you had enough help and advice for your family to plan for the future? _____ (0-5)                        |

Ask the family/caregiver to rate the following from 0 (not at all/nothing) to 5 (very much/everything):

8) How much information have you and your family been given? \_\_\_\_\_ (0-5)  
 9) How confident does the family feel caring for \_\_\_\_\_ (the patient)? \_\_\_\_\_ (0-5)  
 10) Has the family been feeling worried about \_\_\_\_\_ (the patient) over the last 3 days? \_\_\_\_\_ (0-5)

**Visual Symptom Scale**

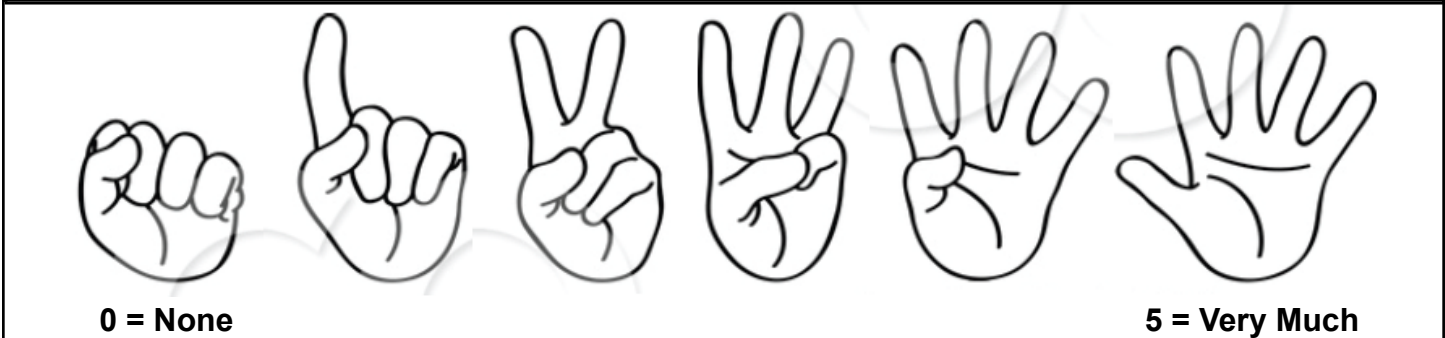

**E. Pain Management (Use Visual Symptom Scale Above)**

|                                          |                                                                                                                                            |
|------------------------------------------|--------------------------------------------------------------------------------------------------------------------------------------------|
| Pain Severity (From 0 to 5): _____ (0-5) | Pain Affects: Sleep? <input type="checkbox"/> Y <input type="checkbox"/> N Mobility? <input type="checkbox"/> Y <input type="checkbox"/> N |
| Duration: _____                          | Current Pain Medication(s): _____                                                                                                          |
| Description of Pain: _____               | Effect of Current Medication(s): <input type="checkbox"/> None                                                                             |
| _____                                    | <input type="checkbox"/> Partial Control <input type="checkbox"/> Complete Control                                                         |
| _____                                    |                                                                                                                                            |

**F. Management Plan**

Patient Referred to POSER for evaluation?  Y  N

|          |       |
|----------|-------|
| Problem: | Plan: |
| Problem: | Plan: |

Completed By: \_\_\_\_\_ Date: \_\_\_/\_\_\_/\_\_\_
